# Supplementary material for: Synthesis, electronic properties and self-assembly on Au{111} of thiolated (oligo)phenothiazines
Source: publisher site journal article supplement (doi:10.3762/bjoc.6.72), 2010-07-02
Supplement: Additional file 1 [file 1860-5397-6-72-S1.pdf]

# Synthesis, Electronic Properties and Self- Assembly on Au{111} of Thiolated (Oligo)phenothiazines

*Adam W. Franz,<sup>a</sup> Svetlana Stoycheva,<sup>b</sup> Michael Himmelhaus,<sup>b</sup> and Thomas J. J. Müller\*<sup>a</sup>*

<sup>a</sup> Institut für Organische Chemie und Makromolekulare Chemie, Heinrich-Heine-Universität  
Düsseldorf, Universitätsstr. 1, D-40225 Düsseldorf, Germany.

<sup>b</sup> Physikalisch-Chemisches Institut, Ruprecht-Karls-Universität Heidelberg, Im Neuenheimer  
Feld 253, D-69120 Heidelberg, Germany.

[ThomasJJ.Mueller@uni-duesseldorf.de](mailto:ThomasJJ.Mueller@uni-duesseldorf.de)

## Supporting Information

|                                                                   |          |
|-------------------------------------------------------------------|----------|
| <b>1) Molecular modeling coordinates of 2a, 2c, 2d, 2e, and 4</b> | <b>3</b> |
| Molecular modeling coordinates (B3LYP/3-21 G) of <b>2a</b>        | 3        |
| Molecular modeling coordinates (B3LYP/3-21 G) of <b>2c</b>        | 4        |
| Molecular modeling coordinates (B3LYP/3-21 G) of <b>2d</b>        | 5        |
| Molecular modeling coordinates (B3LYP/3-21 G) of <b>2e</b>        | 7        |
| Molecular modeling coordinates (B3LYP/3-21 G) of <b>4</b>         | 9        |

|                                                             |           |
|-------------------------------------------------------------|-----------|
| <b>2) Cyclic voltammograms of 2a, 2b, 2c, 2d, 2e, and 4</b> | <b>10</b> |
| Cyclic voltammogram of <b>2a</b>                            | 10        |
| Cyclic voltammogram of <b>2b</b>                            | 10        |
| Cyclic voltammogram of <b>2c</b>                            | 11        |
| Cyclic voltammogram of <b>2d</b>                            | 11        |
| Cyclic voltammogram of <b>2e</b>                            | 12        |
| Cyclic voltammogram of <b>4</b>                             | 12        |
| <br>                                                        |           |
| <b>3) Absorption and emission spectra of 2d, and 2e</b>     | <b>13</b> |
| Absorption and emission spectra of <b>2d</b>                | 13        |
| Absorption and emission spectra of <b>2e</b>                | 13        |
| <br>                                                        |           |
| <b>4) References</b>                                        | <b>14</b> |

1) Molecular modeling coordinates of **2a**, **2c**, **2d**, **2e** and **4** (the hexyl groups were replaced by methyl groups). The DFT calculations were carried out using the Gaussian software package.<sup>1</sup>

**Table 1:** Atom coordinates and total energies (in Hartrees) of **2a**, according to DFT B3LYP/3-21G calculations.

| Center Number | Atomic Number | Atomic Type | Coordinates (Angstroms) |           |           |
|---------------|---------------|-------------|-------------------------|-----------|-----------|
|               |               |             | X                       | Y         | Z         |
| 1             | 6             | 0           | 4.005448                | 0.461579  | -0.866805 |
| 2             | 6             | 0           | 2.835283                | 0.282539  | -0.110389 |
| 3             | 6             | 0           | 2.534772                | -1.015195 | 0.332434  |
| 4             | 6             | 0           | 3.350588                | -2.095176 | 0.020190  |
| 5             | 6             | 0           | 4.524115                | -1.898594 | -0.712182 |
| 6             | 6             | 0           | 4.847868                | -0.614858 | -1.148385 |
| 7             | 1             | 0           | 4.253448                | 1.442584  | -1.248942 |
| 8             | 1             | 0           | 3.073825                | -3.084568 | 0.364055  |
| 9             | 1             | 0           | 5.169629                | -2.738142 | -0.938322 |
| 10            | 1             | 0           | 5.749679                | -0.446158 | -1.725051 |
| 11            | 6             | 0           | -1.677130               | 2.016726  | -0.279130 |
| 12            | 1             | 0           | -2.326392               | 2.795823  | -0.658505 |
| 13            | 6             | 0           | -2.224439               | 0.829138  | 0.200121  |
| 14            | 6             | 0           | -0.011763               | 0.012041  | 0.671478  |
| 15            | 6             | 0           | 0.568880                | 1.198083  | 0.192558  |
| 16            | 6             | 0           | -0.294937               | 2.195861  | -0.290467 |
| 17            | 1             | 0           | 0.112122                | 3.110813  | -0.698798 |
| 18            | 6             | 0           | -1.385445               | -0.186194 | 0.663223  |
| 19            | 1             | 0           | -1.793440               | -1.123329 | 1.010915  |
| 20            | 7             | 0           | 1.973234                | 1.368909  | 0.188093  |
| 21            | 16            | 0           | -4.056292               | 0.665095  | 0.243377  |
| 22            | 16            | 0           | 1.076537                | -1.264242 | 1.422730  |
| 23            | 6             | 0           | 2.513751                | 2.736537  | 0.103210  |
| 24            | 1             | 0           | 2.535575                | 3.132013  | -0.922781 |
| 25            | 1             | 0           | 1.899216                | 3.393725  | 0.723073  |
| 26            | 1             | 0           | 3.530500                | 2.734359  | 0.502945  |
| 27            | 6             | 0           | -4.300282               | -1.066084 | -0.547380 |
| 28            | 8             | 0           | -3.384353               | -1.839607 | -0.746862 |
| 29            | 6             | 0           | -5.768447               | -1.278135 | -0.837263 |
| 30            | 1             | 0           | -6.380967               | -0.901237 | -0.013611 |
| 31            | 1             | 0           | -6.036951               | -0.722628 | -1.743631 |
| 32            | 1             | 0           | -5.957557               | -2.342003 | -0.998086 |

HF= -1497.9606486

Table 2: Atom coordinates and total energies (in Hartrees) of **2c**, according to DFT B3LYP/3-21G calculations.

| Center Number | Atomic Number | Atomic Type | Coordinates (Angstroms) |           |           |
|---------------|---------------|-------------|-------------------------|-----------|-----------|
|               |               |             | X                       | Y         | Z         |
| 1             | 6             | 0           | -8.301158               | -0.769291 | 0.494944  |
| 2             | 6             | 0           | -7.036989               | -0.709635 | -0.115673 |
| 3             | 6             | 0           | -6.315020               | -1.907407 | -0.240551 |
| 4             | 6             | 0           | -6.817751               | -3.111000 | 0.236730  |
| 5             | 6             | 0           | -8.086875               | -3.159458 | 0.819077  |
| 6             | 6             | 0           | -8.825381               | -1.983492 | 0.940453  |
| 7             | 1             | 0           | -8.873721               | 0.137672  | 0.634896  |
| 8             | 1             | 0           | -6.221864               | -4.010361 | 0.137165  |
| 9             | 1             | 0           | -8.486017               | -4.101739 | 1.173290  |
| 10            | 1             | 0           | -9.807607               | -2.001302 | 1.397860  |
| 11            | 6             | 0           | -5.115386               | 0.795392  | -0.450696 |
| 12            | 6             | 0           | -4.154822               | -0.217355 | -0.606804 |
| 13            | 6             | 0           | -3.285654               | 2.348929  | -0.029788 |
| 14            | 1             | 0           | -2.959086               | 3.350816  | 0.222652  |
| 15            | 6             | 0           | -2.333782               | 1.329365  | -0.172488 |
| 16            | 6             | 0           | -2.800506               | 0.032708  | -0.451630 |
| 17            | 1             | 0           | -2.094015               | -0.776762 | -0.591863 |
| 18            | 6             | 0           | -4.648097               | 2.086113  | -0.150732 |
| 19            | 1             | 0           | -5.354685               | 2.888011  | 0.015589  |
| 20            | 16            | 0           | -4.710901               | -1.887744 | -1.137406 |
| 21            | 7             | 0           | -6.496413               | 0.515823  | -0.581102 |
| 22            | 6             | 0           | -7.417838               | 1.635642  | -0.838506 |
| 23            | 1             | 0           | -7.690353               | 2.191192  | 0.070628  |
| 24            | 1             | 0           | -6.943897               | 2.322427  | -1.543893 |
| 25            | 1             | 0           | -8.327095               | 1.240490  | -1.297578 |
| 26            | 6             | 0           | -0.883003               | 1.604200  | -0.029555 |
| 27            | 6             | 0           | -0.039694               | 0.704230  | 0.645341  |
| 28            | 6             | 0           | -0.304724               | 2.764792  | -0.563342 |
| 29            | 6             | 0           | 1.310976                | 0.974193  | 0.798188  |
| 30            | 1             | 0           | -0.453518               | -0.192187 | 1.091628  |
| 31            | 6             | 0           | 1.060031                | 3.013907  | -0.439501 |
| 32            | 1             | 0           | -0.922182               | 3.459475  | -1.120482 |
| 33            | 6             | 0           | 1.900928                | 2.126180  | 0.252572  |
| 34            | 1             | 0           | 1.478066                | 3.894543  | -0.908233 |
| 35            | 6             | 0           | 3.916038                | 0.055006  | 0.911053  |
| 36            | 16            | 0           | 2.341047                | -0.141171 | 1.836032  |
| 37            | 7             | 0           | 3.288422                | 2.368821  | 0.388590  |
| 38            | 6             | 0           | 3.785327                | 3.741306  | 0.190014  |
| 39            | 1             | 0           | 3.074521                | 4.438454  | 0.639897  |
| 40            | 1             | 0           | 4.743459                | 3.843098  | 0.705090  |
| 41            | 1             | 0           | 3.920781                | 4.003775  | -0.869232 |
| 42            | 6             | 0           | 4.220147                | 1.302540  | 0.342278  |
| 43            | 6             | 0           | 5.470600                | 1.441642  | -0.279874 |
| 44            | 1             | 0           | 5.732221                | 2.375678  | -0.758640 |
| 45            | 6             | 0           | 4.803877                | -1.008086 | 0.845759  |
| 46            | 1             | 0           | 4.527093                | -1.964484 | 1.272700  |
| 47            | 6             | 0           | 6.055000                | -0.833544 | 0.248456  |
| 48            | 6             | 0           | 6.392804                | 0.394644  | -0.312575 |
| 49            | 1             | 0           | 7.346347                | 0.521172  | -0.800604 |
| 50            | 16            | 0           | 7.170692                | -2.308266 | 0.295590  |
| 51            | 6             | 0           | 8.602666                | -1.942857 | -0.887794 |
| 52            | 6             | 0           | 9.447227                | -3.192879 | -1.025277 |
| 53            | 1             | 0           | 9.027480                | -3.815125 | -1.825339 |
| 54            | 1             | 0           | 10.465002               | -2.906417 | -1.301557 |
| 55            | 1             | 0           | 9.450337                | -3.775235 | -0.101442 |
| 56            | 8             | 0           | 8.802202                | -0.876935 | -1.447861 |

HF=-2446.7026242

Table B: Atom coordinates and total energies (in Hartrees) of **2d**, according to DFT B3LYP/3-21G calculations.

| Center Number | Atomic Number | Atomic Type | Coordinates (Angstroms) |           |           |
|---------------|---------------|-------------|-------------------------|-----------|-----------|
|               |               |             | X                       | Y         | Z         |
| 1             | 6             | 0           | -4.160206               | -4.128755 | 0.008498  |
| 2             | 6             | 0           | -2.932991               | -3.670437 | 0.516378  |
| 3             | 6             | 0           | -2.839672               | -2.308050 | 0.844027  |
| 4             | 6             | 0           | -3.906970               | -1.441847 | 0.665720  |
| 5             | 6             | 0           | -5.143016               | -1.908193 | 0.184352  |
| 6             | 6             | 0           | -5.245507               | -3.268584 | -0.139402 |
| 7             | 1             | 0           | -4.262653               | -5.161388 | -0.296668 |
| 8             | 1             | 0           | -3.795410               | -0.401305 | 0.946620  |
| 9             | 1             | 0           | -6.172468               | -3.650249 | -0.550678 |
| 10            | 6             | 0           | -0.505523               | -4.099778 | 0.455970  |
| 11            | 6             | 0           | -0.111072               | -2.789633 | 0.773566  |
| 12            | 6             | 0           | 1.771124                | -4.510143 | -0.310616 |
| 13            | 1             | 0           | 2.491772                | -5.183980 | -0.758711 |
| 14            | 6             | 0           | 2.155090                | -3.198063 | 0.000984  |
| 15            | 6             | 0           | 1.177854                | -2.339374 | 0.534211  |
| 16            | 1             | 0           | 1.442553                | -1.324926 | 0.808046  |
| 17            | 6             | 0           | 0.465331                | -4.947624 | -0.103246 |
| 18            | 1             | 0           | 0.194113                | -5.951492 | -0.401018 |
| 19            | 16            | 0           | -1.302005               | -1.687656 | 1.637900  |
| 20            | 7             | 0           | -1.830066               | -4.540782 | 0.686396  |
| 21            | 6             | 0           | -2.084902               | -5.989976 | 0.757407  |
| 22            | 1             | 0           | -2.192751               | -6.459542 | -0.231002 |
| 23            | 1             | 0           | -1.255455               | -6.464918 | 1.286651  |
| 24            | 1             | 0           | -3.000602               | -6.155538 | 1.329907  |
| 25            | 6             | 0           | 3.546327                | -2.730803 | -0.215672 |
| 26            | 6             | 0           | 3.811382                | -1.445873 | -0.721194 |
| 27            | 6             | 0           | 4.641903                | -3.551991 | 0.086937  |
| 28            | 6             | 0           | 5.113385                | -1.021553 | -0.935921 |
| 29            | 1             | 0           | 2.990490                | -0.791095 | -0.988372 |
| 30            | 6             | 0           | 5.949013                | -3.108047 | -0.095862 |
| 31            | 1             | 0           | 4.469769                | -4.533087 | 0.513380  |
| 32            | 6             | 0           | 6.216232                | -1.832075 | -0.619777 |
| 33            | 1             | 0           | 6.768136                | -3.750701 | 0.196996  |
| 34            | 6             | 0           | 6.982258                | 1.016988  | -0.903102 |
| 35            | 16            | 0           | 5.411655                | 0.596315  | -1.758331 |
| 36            | 7             | 0           | 7.539867                | -1.370615 | -0.812397 |
| 37            | 6             | 0           | 8.627906                | -2.361666 | -0.876123 |
| 38            | 1             | 0           | 8.278153                | -3.228135 | -1.442314 |
| 39            | 1             | 0           | 9.472518                | -1.918245 | -1.408650 |
| 40            | 1             | 0           | 8.967271                | -2.696262 | 0.114854  |
| 41            | 6             | 0           | 7.877739                | -0.014840 | -0.578276 |
| 42            | 6             | 0           | 9.104731                | 0.351562  | -0.003737 |
| 43            | 1             | 0           | 9.810233                | -0.413098 | 0.292413  |
| 44            | 6             | 0           | 7.284680                | 2.346721  | -0.651283 |
| 45            | 1             | 0           | 6.560572                | 3.115892  | -0.891443 |
| 46            | 6             | 0           | 8.526574                | 2.686622  | -0.108458 |
| 47            | 6             | 0           | 9.441385                | 1.688357  | 0.213722  |
| 48            | 1             | 0           | 10.387601               | 1.947664  | 0.661677  |
| 49            | 16            | 0           | 8.831236                | 4.498666  | 0.105996  |
| 50            | 6             | 0           | 10.383877               | 4.664959  | 1.176709  |
| 51            | 6             | 0           | 10.574319               | 6.126388  | 1.527101  |
| 52            | 1             | 0           | 9.985052                | 6.353764  | 2.424010  |
| 53            | 1             | 0           | 11.629930               | 6.305546  | 1.745512  |
| 54            | 1             | 0           | 10.234713               | 6.776609  | 0.717978  |
| 55            | 8             | 0           | 11.102516               | 3.742828  | 1.527553  |
| 56            | 6             | 0           | -6.297532               | -0.989383 | 0.030837  |
| 57            | 6             | 0           | -6.123800               | 0.318402  | -0.455484 |
| 58            | 6             | 0           | -7.596194               | -1.390030 | 0.376374  |
| 59            | 6             | 0           | -7.206947               | 1.169193  | -0.609558 |
| 60            | 1             | 0           | -5.139031               | 0.656793  | -0.754949 |
| 61            | 6             | 0           | -8.676700               | -0.519946 | 0.253289  |

|    |    |   |            |           |           |
|----|----|---|------------|-----------|-----------|
| 62 | 1  | 0 | -7.756224  | -2.378895 | 0.789474  |
| 63 | 6  | 0 | -8.507958  | 0.780710  | -0.250313 |
| 64 | 1  | 0 | -9.655346  | -0.847811 | 0.577074  |
| 65 | 6  | 0 | -8.252681  | 3.725775  | -0.464611 |
| 66 | 6  | 0 | -9.436365  | 3.057862  | -0.112039 |
| 67 | 16 | 0 | -6.964070  | 2.810088  | -1.402454 |
| 68 | 7  | 0 | -9.596892  | 1.674897  | -0.382218 |
| 69 | 6  | 0 | -10.960930 | 1.120519  | -0.412879 |
| 70 | 1  | 0 | -11.360023 | 0.894217  | 0.586652  |
| 71 | 1  | 0 | -11.619521 | 1.842506  | -0.901435 |
| 72 | 1  | 0 | -10.951551 | 0.203067  | -1.006215 |
| 73 | 6  | 0 | -10.442738 | 3.802921  | 0.525368  |
| 74 | 1  | 0 | -11.356109 | 3.314929  | 0.837754  |
| 75 | 6  | 0 | -9.086452  | 5.806753  | 0.432031  |
| 76 | 1  | 0 | -8.948263  | 6.861214  | 0.636229  |
| 77 | 6  | 0 | -10.274693 | 5.165166  | 0.777707  |
| 78 | 1  | 0 | -11.071801 | 5.717363  | 1.261458  |
| 79 | 6  | 0 | -8.067140  | 5.072450  | -0.179714 |
| 80 | 1  | 0 | -7.131962  | 5.547268  | -0.451413 |

-----  
HF=-3395.4443006

Table 4: Atom coordinates and total energies (in Hartrees) of **2e**, according to DFT B3LYP/3-21G calculations.

| Center<br>Number | Atomic<br>Number | Atomic<br>Type | Coordinates (Angstroms) |           |           |
|------------------|------------------|----------------|-------------------------|-----------|-----------|
|                  |                  |                | X                       | Y         | Z         |
| 1                | 6                | 0              | 1.519779                | -6.805646 | 0.342913  |
| 2                | 6                | 0              | 2.334711                | -5.776886 | 0.843834  |
| 3                | 6                | 0              | 1.734892                | -4.525320 | 1.058894  |
| 4                | 6                | 0              | 0.398566                | -4.298940 | 0.769205  |
| 5                | 6                | 0              | -0.420048               | -5.334836 | 0.285538  |
| 6                | 6                | 0              | 0.168084                | -6.591688 | 0.084109  |
| 7                | 1                | 0              | 1.949520                | -7.774563 | 0.127167  |
| 8                | 1                | 0              | -0.025165               | -3.319890 | 0.958727  |
| 9                | 1                | 0              | -0.428117               | -7.399395 | -0.323520 |
| 10               | 6                | 0              | 4.657583                | -4.961192 | 0.850434  |
| 11               | 6                | 0              | 4.344184                | -3.609997 | 1.069779  |
| 12               | 6                | 0              | 6.863005                | -4.242359 | 0.104922  |
| 13               | 1                | 0              | 7.834328                | -4.500753 | -0.299786 |
| 14               | 6                | 0              | 6.539331                | -2.894100 | 0.315401  |
| 15               | 6                | 0              | 5.250099                | -2.598339 | 0.792869  |
| 16               | 1                | 0              | 4.969465                | -1.570394 | 0.989188  |
| 17               | 6                | 0              | 5.938533                | -5.253879 | 0.353433  |
| 18               | 1                | 0              | 6.207954                | -6.278062 | 0.133060  |
| 19               | 16               | 0              | 2.729225                | -3.191865 | 1.843010  |
| 20               | 7                | 0              | 3.710170                | -5.980605 | 1.109568  |
| 21               | 6                | 0              | 4.194510                | -7.360567 | 1.284955  |
| 22               | 1                | 0              | 4.376286                | -7.880349 | 0.333030  |
| 23               | 1                | 0              | 5.125101                | -7.333397 | 1.856679  |
| 24               | 1                | 0              | 3.451890                | -7.920840 | 1.857992  |
| 25               | 6                | 0              | 7.517570                | -1.813779 | 0.039060  |
| 26               | 6                | 0              | 7.107849                | -0.594716 | -0.529686 |
| 27               | 6                | 0              | 8.879073                | -1.968291 | 0.338011  |
| 28               | 6                | 0              | 8.026610                | 0.404570  | -0.808347 |
| 29               | 1                | 0              | 6.068166                | -0.445295 | -0.795484 |
| 30               | 6                | 0              | 9.793731                | -0.948606 | 0.087056  |
| 31               | 1                | 0              | 9.220314                | -2.880321 | 0.813185  |
| 32               | 6                | 0              | 9.389638                | 0.261430  | -0.501589 |
| 33               | 1                | 0              | 10.826916               | -1.085987 | 0.376239  |
| 34               | 6                | 0              | 8.643924                | 3.097396  | -0.922895 |
| 35               | 16               | 0              | 7.475149                | 1.913667  | -1.703048 |
| 36               | 7                | 0              | 10.309924               | 1.303350  | -0.766077 |
| 37               | 6                | 0              | 11.743914               | 0.973377  | -0.835427 |
| 38               | 1                | 0              | 11.857226               | 0.017386  | -1.352108 |
| 39               | 1                | 0              | 12.251445               | 1.745017  | -1.419034 |
| 40               | 1                | 0              | 12.220517               | 0.902964  | 0.153101  |
| 41               | 6                | 0              | 9.938206                | 2.659867  | -0.597471 |
| 42               | 6                | 0              | 10.834131               | 3.612897  | -0.088853 |
| 43               | 1                | 0              | 11.831024               | 3.311923  | 0.203912  |
| 44               | 6                | 0              | 8.252637                | 4.413535  | -0.728665 |
| 45               | 1                | 0              | 7.238364                | 4.711737  | -0.965112 |
| 46               | 6                | 0              | 9.173245                | 5.348814  | -0.248826 |
| 47               | 6                | 0              | 10.468886               | 4.950672  | 0.067533  |
| 48               | 1                | 0              | 11.170388               | 5.665690  | 0.467372  |
| 49               | 16               | 0              | 8.545933                | 7.082950  | -0.104717 |
| 50               | 6                | 0              | 9.818969                | 8.034832  | 0.924867  |
| 51               | 6                | 0              | 9.260594                | 9.408805  | 1.232882  |
| 52               | 1                | 0              | 8.656202                | 9.346418  | 2.146264  |
| 53               | 1                | 0              | 10.089253               | 10.099622 | 1.406987  |
| 54               | 1                | 0              | 8.623874                | 9.770337  | 0.422598  |
| 55               | 8                | 0              | 10.903997               | 7.603975  | 1.280968  |
| 56               | 6                | 0              | -1.854217               | -5.098937 | -0.011560 |
| 57               | 6                | 0              | -2.277403               | -3.907992 | -0.627585 |
| 58               | 6                | 0              | -2.832414               | -6.051271 | 0.307887  |
| 59               | 6                | 0              | -3.613124               | -3.700948 | -0.933920 |
| 60               | 1                | 0              | -1.548124               | -3.157872 | -0.909771 |
| 61               | 6                | 0              | -4.178369               | -5.823254 | 0.031729  |

|     |    |   |            |           |           |
|-----|----|---|------------|-----------|-----------|
| 62  | 1  | 0 | -2.542704  | -6.962878 | 0.817033  |
| 63  | 6  | 0 | -4.600486  | -4.644456 | -0.606359 |
| 64  | 1  | 0 | -4.909426  | -6.559525 | 0.337434  |
| 65  | 6  | 0 | -5.769324  | -1.975800 | -1.178162 |
| 66  | 6  | 0 | -6.516155  | -3.106857 | -0.812041 |
| 67  | 16 | 0 | -4.093847  | -2.210200 | -1.896239 |
| 68  | 7  | 0 | -5.963890  | -4.407998 | -0.901098 |
| 69  | 6  | 0 | -6.882909  | -5.558638 | -0.938730 |
| 70  | 1  | 0 | -7.234227  | -5.865042 | 0.057210  |
| 71  | 1  | 0 | -7.746799  | -5.295815 | -1.553753 |
| 72  | 1  | 0 | -6.368005  | -6.400787 | -1.407076 |
| 73  | 6  | 0 | -7.824763  | -2.892712 | -0.347244 |
| 74  | 1  | 0 | -8.429467  | -3.734251 | -0.037321 |
| 75  | 6  | 0 | -7.606941  | -0.484694 | -0.631519 |
| 76  | 6  | 0 | -8.363892  | -1.610526 | -0.277310 |
| 77  | 1  | 0 | -9.389977  | -1.483247 | 0.046636  |
| 78  | 6  | 0 | -6.287411  | -0.694444 | -1.068528 |
| 79  | 1  | 0 | -5.660181  | 0.152865  | -1.317985 |
| 80  | 6  | 0 | -8.176012  | 0.883439  | -0.553500 |
| 81  | 6  | 0 | -7.924824  | 1.836800  | -1.550448 |
| 82  | 6  | 0 | -8.997382  | 1.262864  | 0.522716  |
| 83  | 6  | 0 | -8.480126  | 3.112473  | -1.484832 |
| 84  | 1  | 0 | -7.323462  | 1.564037  | -2.409624 |
| 85  | 6  | 0 | -9.518902  | 2.544405  | 0.602045  |
| 86  | 1  | 0 | -9.193647  | 0.561524  | 1.324871  |
| 87  | 6  | 0 | -9.286139  | 3.499411  | -0.400970 |
| 88  | 1  | 0 | -8.303579  | 3.804608  | -2.297112 |
| 89  | 16 | 0 | -10.449433 | 3.051790  | 2.104541  |
| 90  | 7  | 0 | -9.853235  | 4.793577  | -0.320549 |
| 91  | 6  | 0 | -11.613627 | 4.216387  | 1.288088  |
| 92  | 6  | 0 | -11.156102 | 4.984293  | 0.205026  |
| 93  | 6  | 0 | -12.897682 | 4.369213  | 1.794997  |
| 94  | 6  | 0 | -12.037032 | 5.932802  | -0.341633 |
| 95  | 6  | 0 | -13.754027 | 5.333481  | 1.257389  |
| 96  | 1  | 0 | -13.218719 | 3.745047  | 2.620377  |
| 97  | 6  | 0 | -13.313959 | 6.115857  | 0.190899  |
| 98  | 1  | 0 | -11.729746 | 6.522283  | -1.194879 |
| 99  | 1  | 0 | -14.747979 | 5.465550  | 1.666448  |
| 100 | 1  | 0 | -13.968146 | 6.862273  | -0.244088 |
| 101 | 6  | 0 | -9.256509  | 5.872533  | -1.126330 |
| 102 | 1  | 0 | -8.169683  | 5.762742  | -1.105723 |
| 103 | 1  | 0 | -9.594969  | 5.870504  | -2.172664 |
| 104 | 1  | 0 | -9.516144  | 6.831697  | -0.672119 |

-----  
HF=-4344.186148



Table 5: Atom coordinates and total energies (in Hartrees) of **4**, according to DFT B3LYP/3-21G calculations.

| Center Number | Atomic Number | Atomic Type | Coordinates (Angstroms) |           |           |
|---------------|---------------|-------------|-------------------------|-----------|-----------|
|               |               |             | X                       | Y         | Z         |
| 1             | 6             | 0           | 2.337461                | 1.706874  | 0.074467  |
| 2             | 6             | 0           | 1.230746                | 1.089456  | -0.529000 |
| 3             | 6             | 0           | 1.381879                | -0.242905 | -0.946840 |
| 4             | 6             | 0           | 2.567926                | -0.934638 | -0.753225 |
| 5             | 6             | 0           | 3.664890                | -0.286223 | -0.179493 |
| 6             | 6             | 0           | 3.552513                | 1.038752  | 0.231999  |
| 7             | 1             | 0           | 2.253998                | 2.721355  | 0.440358  |
| 8             | 1             | 0           | 2.641849                | -1.970282 | -1.062064 |
| 9             | 1             | 0           | 4.386152                | 1.529358  | 0.708860  |
| 10            | 7             | 0           | 0.000016                | 1.768987  | -0.700023 |
| 11            | 16            | 0           | 0.000022                | -1.053329 | -1.847571 |
| 12            | 6             | 0           | -1.230716               | 1.089435  | -0.528972 |
| 13            | 6             | 0           | -2.337390               | 1.706745  | 0.074692  |
| 14            | 6             | 0           | -1.381810               | -0.242943 | -0.946763 |
| 15            | 6             | 0           | -3.552388               | 1.038554  | 0.232334  |
| 16            | 1             | 0           | -2.253934               | 2.721191  | 0.440673  |
| 17            | 6             | 0           | -2.567789               | -0.934757 | -0.753014 |
| 18            | 6             | 0           | -3.664732               | -0.286424 | -0.179165 |
| 19            | 1             | 0           | -4.385988               | 1.529073  | 0.709345  |
| 20            | 1             | 0           | -2.641660               | -1.970410 | -1.061842 |
| 21            | 6             | 0           | 0.000051                | 3.241391  | -0.659199 |
| 22            | 1             | 0           | -0.886565               | 3.604605  | -1.184182 |
| 23            | 1             | 0           | -0.000005               | 3.646482  | 0.363040  |
| 24            | 1             | 0           | 0.886770                | 3.604545  | -1.184056 |
| 25            | 16            | 0           | -5.210634               | -1.293776 | -0.053567 |
| 26            | 16            | 0           | 5.210917                | -1.293377 | -0.054108 |
| 27            | 6             | 0           | -6.341158               | -0.390485 | 1.168922  |
| 28            | 6             | 0           | -7.532951               | -1.275285 | 1.470579  |
| 29            | 1             | 0           | -7.285617               | -1.918045 | 2.324503  |
| 30            | 1             | 0           | -8.385154               | -0.646870 | 1.741106  |
| 31            | 1             | 0           | -7.781575               | -1.913073 | 0.619798  |
| 32            | 6             | 0           | 6.340597                | -0.390868 | 1.169833  |
| 33            | 6             | 0           | 7.532956                | -1.275244 | 1.470484  |
| 34            | 1             | 0           | 8.384496                | -0.646643 | 1.742640  |
| 35            | 1             | 0           | 7.285665                | -1.919896 | 2.322987  |
| 36            | 1             | 0           | 7.782528                | -1.911187 | 0.618586  |
| 37            | 8             | 0           | 6.132653                | 0.718197  | 1.634315  |
| 38            | 8             | 0           | -6.133461               | 0.718802  | 1.632999  |

HF=-2045.9902446

## 2) Cyclic voltammetry of **2a-e** and **4**

**Electrochemistry:** Cyclic voltammetry experiments (EG & G potentiostatic instrumentation) were performed under argon in dry and degassed  $\text{CH}_2\text{Cl}_2$  at room temperature and at scan rates of 100, 250, 500, and 1000  $\text{mVs}^{-1}$ . The electrolyte was  $\text{Bu}_4\text{NPF}_6$  (0.025 M). The working electrode was a 1 mm platinum disk, the counter-electrode was a platinum wire, and the reference electrode was a Ag/AgCl electrode. The potentials were corrected to the internal standard of  $\text{Fc}/\text{Fc}^+$  in  $\text{CH}_2\text{Cl}_2$  ( $E_0^{0/+1} = 450 \text{ mV}$ ).<sup>2</sup>

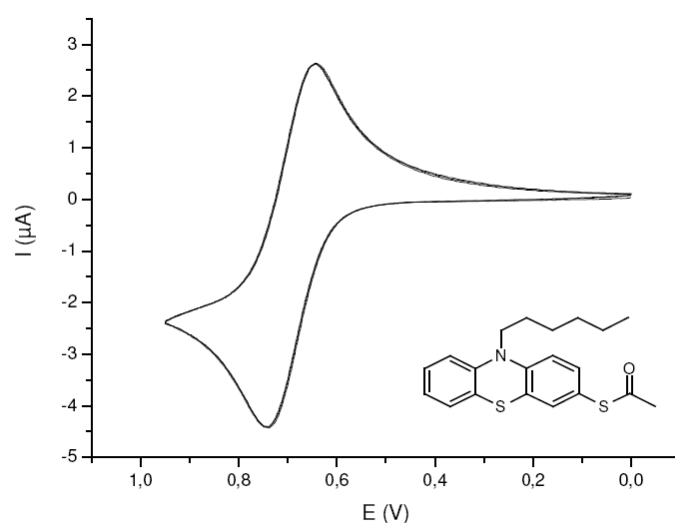

Figure 1. Cyclic voltammogram of thioacetate **2a** (recorded in  $\text{CH}_2\text{Cl}_2$ ,  $T = 293 \text{ K}$ ; 0.1 M electrolyte  $[\text{Bu}_4\text{N}][\text{PF}_6]$ ;  $\nu = 100 \text{ mV/s}$ ; Pt-working electrode, Ag/AgCl-reference and Pt-counter electrode).

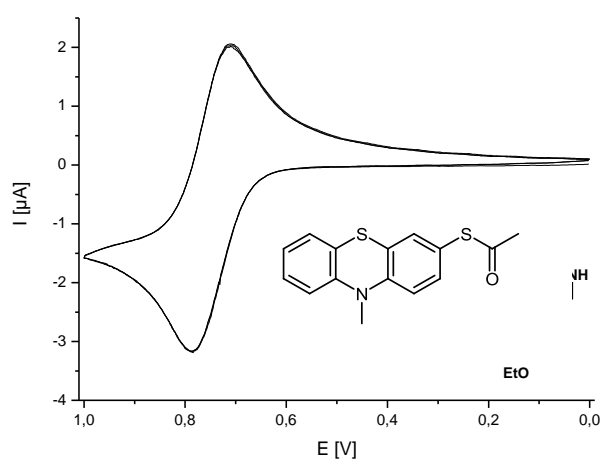

Figure 2. Cyclic voltammogram of thioacetate **2b** (recorded in  $\text{CH}_2\text{Cl}_2$ ,  $T = 293 \text{ K}$ ; 0.1 M electrolyte  $[\text{Bu}_4\text{N}][\text{PF}_6]$ ;  $\nu = 100 \text{ mV/s}$ ; Pt-working electrode, Ag/AgCl-reference and Pt-counter electrode).

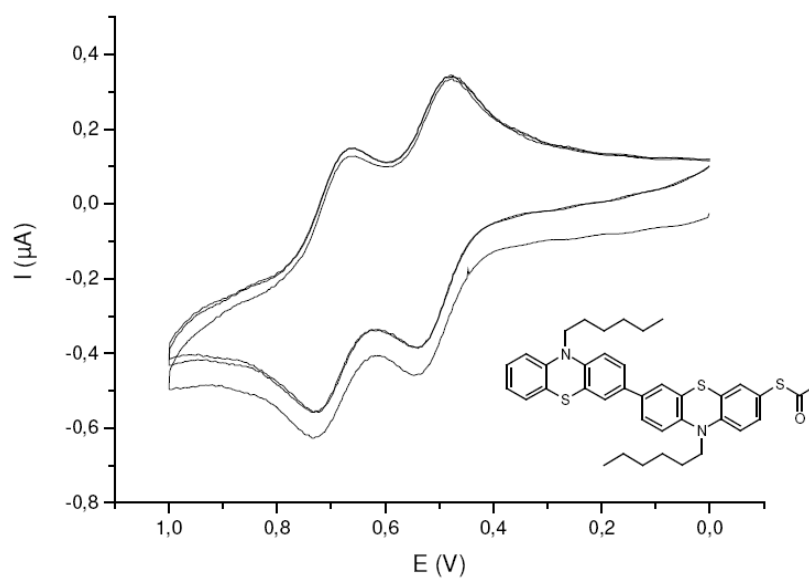

Figure 3. Cyclic voltammogram of thioacetate **2c** (recorded in  $\text{CH}_2\text{Cl}_2$ ,  $T = 293 \text{ K}$ ;  $0.1 \text{ M}$  electrolyte  $[\text{Bu}_4\text{N}][\text{PF}_6]$ ;  $\nu = 100 \text{ mV/s}$ ; Pt-working electrode, Ag/AgCl-reference and Pt-counter electrode).

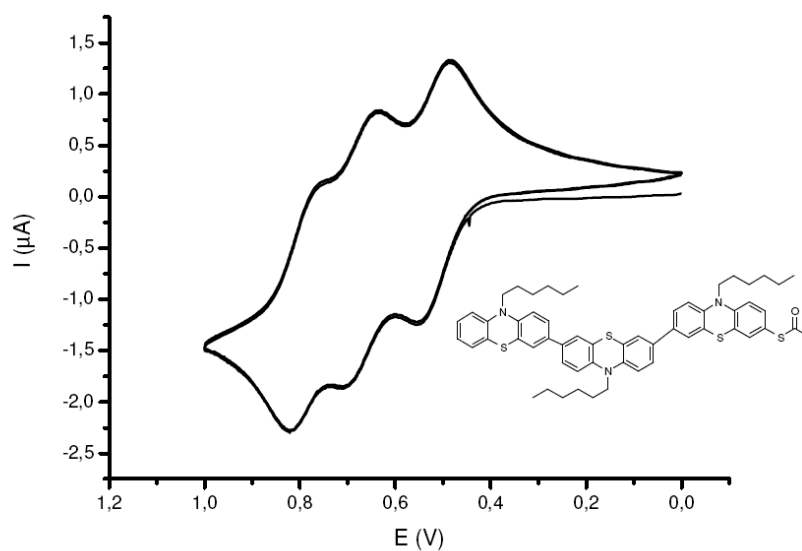

Figure 4. Cyclic voltammogram of thioacetate **2d** (recorded in  $\text{CH}_2\text{Cl}_2$ ,  $T = 293 \text{ K}$ ;  $0.1 \text{ M}$  electrolyte  $[\text{Bu}_4\text{N}][\text{PF}_6]$ ;  $\nu = 100 \text{ mV/s}$ ; Pt-working electrode, Ag/AgCl-reference and Pt-counter electrode).

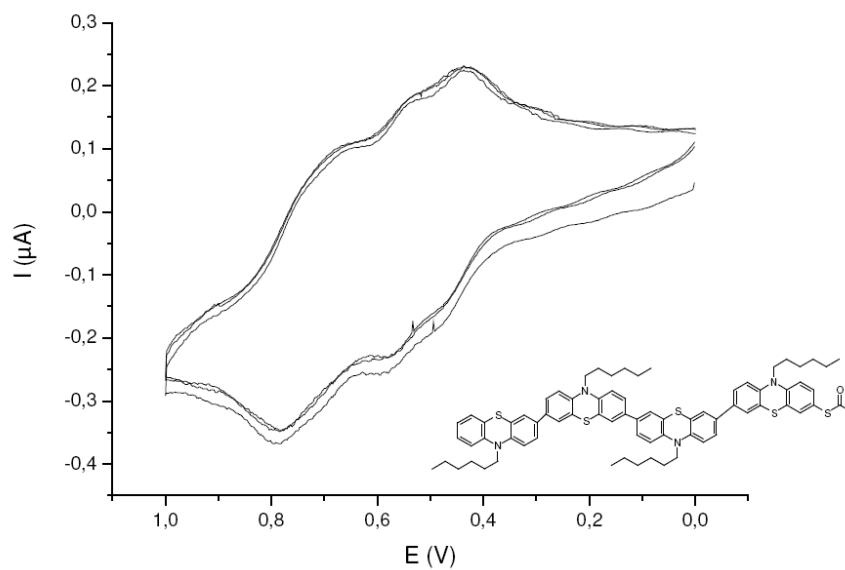

Figure 5. Cyclic voltammogram of thioacetate **2e** (recorded in  $\text{CH}_2\text{Cl}_2$ ,  $T = 293 \text{ K}$ ;  $0.1 \text{ M}$  electrolyte  $[\text{Bu}_4\text{N}][\text{PF}_6]$ ;  $\nu = 100 \text{ mV/s}$ ; Pt-working electrode, Ag/AgCl-reference and Pt-counter electrode).

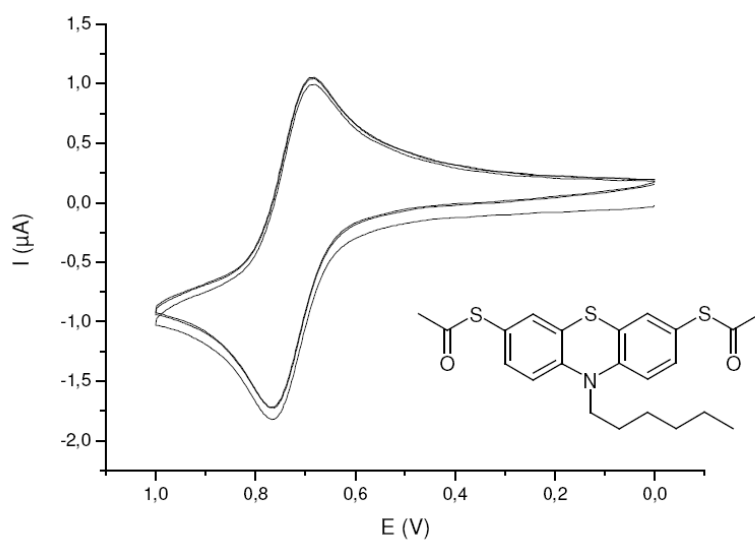

Figure 6. Cyclic voltammogram of thioacetate **4** (recorded in  $\text{CH}_2\text{Cl}_2$ ,  $T = 293 \text{ K}$ ;  $0.1 \text{ M}$  electrolyte  $[\text{Bu}_4\text{N}][\text{PF}_6]$ ;  $\nu = 100 \text{ mV/s}$ ; Pt-working electrode, Ag/AgCl-reference and Pt-counter electrode).

### 3) Absorption and emission spectra of **2d**, and **2e**

Absorption and emission spectra of **2d**

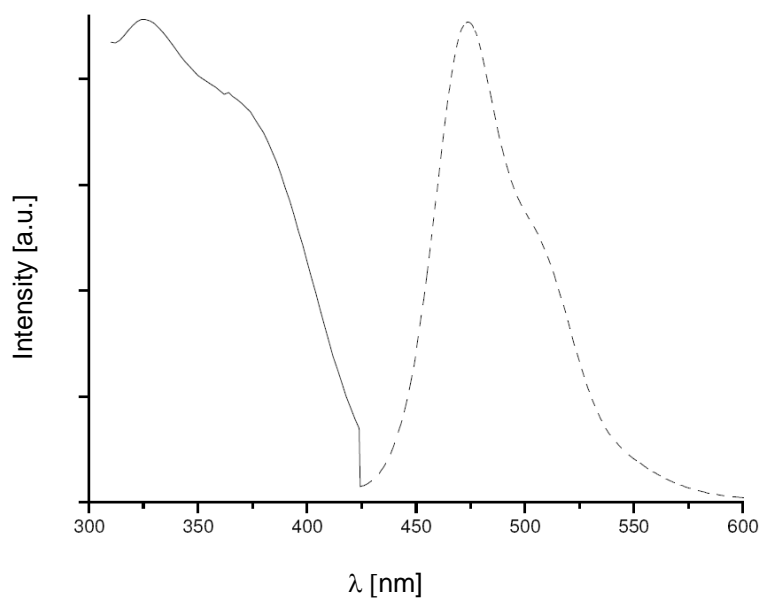

Figure 7. Normalized absorption (solid line) and emission (dashed line) spectra of thioacetate **2d** (recorded in dichloromethane,  $T = 298$  K).

Absorption and emission spectra of **2e**

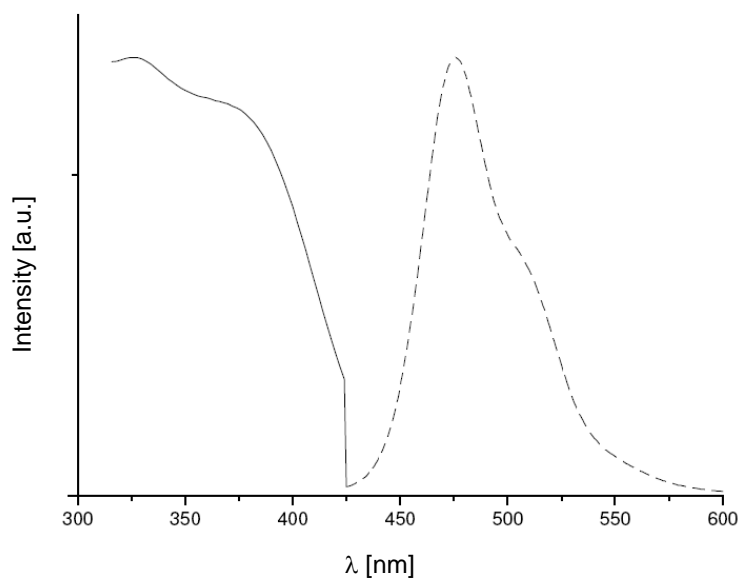

Figure 8. Normalized absorption (solid line) and emission (dashed line) spectra of thioacetate **2e** (recorded in dichloromethane,  $T = 298$  K).

#### 4) References:

- (1) Frisch, M. J.; Trucks, G. W.; Schlegel, H. B.; Scuseria, G. E.; Robb, M. A.; Cheeseman, J. R.; Montgomery, J. A. Jr.; Vreven, T.; Kudin, K. N.; Burant, J. C.; Millam, J. M.; Iyengar, S. S.; Tomasi, J.; Barone, V.; Mennucci, B.; Cossi, M.; Scalmani, G.; Rega, N.; Petersson, G. A.; Nakatsuji, H.; Hada, M.; Ehara, M.; Toyota, K.; Fukuda, R.; Hasegawa, J.; Ishida, M.; Nakajima, T.; Honda, Y.; Kitao, O.; Nakai, H.; Klene, M.; Li, X.; Knox, J. E.; Hratchian, H. P.; Cross, J. B.; Adamo, C.; Jaramillo, J.; Gomperts, R.; Stratmann, R. E.; Yazyev, O.; Austin, A. J.; Cammi, R.; Pomelli, C.; Ochterski, J. W.; Ayala, P. Y.; Morokuma, K.; Voth, G. A.; Salvador, P.; Dannenberg, J. J.; Zakrzewski, V. G.; Dapprich, S.; Daniels, A. D.; Strain, M. C.; Farkas, O.; Malick, D. K.; Rabuck, A. D.; Raghavachari, K.; Foresman, J. B.; Ortiz, J. V.; Cui, Q.; Baboul, A. G.; Clifford, S.; Cioslowski, J.; Stefanov, B. B.; Liu, G.; Liashenko, A.; Piskorz, P.; Komaromi, I.; Martin, R. L.; Fox, D. J.; Keith, T.; Al-Laham, M. A.; Peng, C. Y.; Nanayakkara, A.; Challacombe, M.; Gill, P. M.W.; Johnson, B.; Chen, W.; Wong, M. W.; Gonzalez, C.; Pople, J. A.; *Gaussian '03*, Gaussian, Inc., Pittsburgh PA, **2003**.
- (2) Zanello, P. in: *Ferrocenes* (Eds.: Togni, A.; Hayashi, T.), VCH, Weinheim, New York, Basel, Cambridge, Tokyo, **1995**, pp. 317 – 430.
